# Supplementary material
Source: PubMed Central journal article supplement (PMC7450398)
Supplement: jamacardiol-e203538-s001.pdf [file jamacardiol-e203538-s001.pdf]

## Supplementary Online Content

Lombardi CM, Carubelli V, Iorio A, et al. Association of troponin levels with mortality in Italian patients hospitalized with coronavirus disease 2019. *JAMA Cardiol*. Published online August 26, 2020. doi:10.1001/jamacardio.2020.3538

**eAppendix.** List of Centers and Investigators.

**eTable 1.** Laboratory findings of the study population at admission stratified by baseline troponin level (N=614).

**eTable 2.** Multivariable logistic regression model for elevated level of troponin (N=533).

**eTable 3.** In-hospital management and outcomes of the study population stratified by baseline troponin level (N=614).

**eTable 4.** Univariable and multivariable Cox regression model for death.

**eTable 5.** Univariable and multivariable Cox regression model for death, including lymphocytes and respiratory rate.

**eTable 6.** Univariable and multivariable Cox regression model for death, including lymphocytes, respiratory rate, prior ACEi/ARB therapy and prior statin therapy.

**eTable 7.** Univariable and multivariable Cox regression model, including prior ACEi/ARB therapy and prior statin therapy.

This supplementary material has been provided by the authors to give readers additional information about their work.

eAppendix. List of Centers and Investigators

| Study centers                                                                                                                                                                    | Principal investigator              |
|----------------------------------------------------------------------------------------------------------------------------------------------------------------------------------|-------------------------------------|
| 1. Institute of Cardiology, ASST Spedali Civili, Department of Medical and Surgical Specialties, Radiological Sciences, and Public Health, University of Brescia, Brescia, Italy | Prof Marco Metra                    |
| 2. Division of Cardiology, Cardiovascular Department, ASST Papa Giovanni XXIII Hospital, Bergamo, Italy.                                                                         | Dr Michele Senni                    |
| 3. Centro Cardiologico Monzino, IRCCS, Milan, Italy; Department of Clinical Sciences and Community Health, Cardiovascular Section, University of Milan, Milan, Italy.            | Prof Pier Giuseppe Agostoni         |
| 4. Division of Cardiology, ASST Santi Paolo e Carlo, University of Milan, Milan, Italy.                                                                                          | Prof Stefano Carugo                 |
| 5. Division of Cardiology, ASST Cremona, Cremona                                                                                                                                 | Dr Gian battista Danzi              |
| 6. Coronary Care Unit and Laboratory of Clinical and Experimental Cardiology- Fondazione IRCCS Policlinico San Matteo, University of Pavia, Pavia, Italy.                        | Dr Sergio Leonardi                  |
| 7. Department of Cardiology, Policlinico di Monza, Monza, Italy.                                                                                                                 | Dr Andrea Mortara                   |
| 8. Department of Cardiology, Istituti Clinici Scientifici Maugeri IRCCS, Institute of Montescano, Pavia, Italy                                                                   | Dr Maria Teresa La Rovere           |
| 9. Cardiovascular Department, Azienda Sanitaria Universitaria Integrata di Trieste (ASUITS), University of Trieste, Trieste, Italy                                               | Prof Gianfranco Sinagra             |
| 10. Cardiovascular Disease Unit, IRCCS Ospedale Policlinico San Martino, Genova, Italy                                                                                           | Prof Pietro Ameri                   |
| 11. Heart Failure Unit, Cardiology, G. da Saliceto Hospital, Piacenza, Italy                                                                                                     | Dr Massimo Piepoli                  |
| 12. Cardiology Rehabilitation Unit, S. Raffaele IRCCS, Rome, Italy.                                                                                                              | Dr Maurizio Volterrani              |
| 13. Division of Cardiology, Buccheri La Ferla-Fatebenefratelli Hospital, Palermo, Italy                                                                                          | Dr Maurizio Volterrani<br>Dr.Saullo |



**eTable 1. Laboratory findings of the study population at admission stratified by baseline troponin level (N=614).**

|                                             | Reference Range | Normal troponin (N=336) |                  | Elevated troponin (N=278) |                   | p-value |
|---------------------------------------------|-----------------|-------------------------|------------------|---------------------------|-------------------|---------|
|                                             |                 | N                       |                  | N                         |                   |         |
| Red blood cell count (x10 <sup>6</sup> /μL) | 4.0-5.2         | 331                     | 4.46 (4.03-4.83) | 277                       | 4.35 (3.90-4.78)  | 0.040   |
| Hemoglobin (g/dl)                           | 12.0-16.0       | 330                     | 13.3 (11.9-14.4) | 275                       | 13.1 (11.2-14.2)  | 0.118   |
| Hematocrit (%)                              | 37.0-47.0       | 330                     | 38.8 (35.4-42.0) | 274                       | 38.5 (33.9-42.1)  | 0.371   |
| White blood cell count (per μL)             | 4000-10800      | 332                     | 6630 (5000-8525) | 277                       | 7650 (5200-10600) | 0.001   |
| Lymphocytes absolute (per μL)               | 900-4000        | 300                     | 973 (630-1400)   | 242                       | 880 (600-1140)    | 0.008   |
| Platelets count, (x10 <sup>3</sup> /μL)     | 130-400         | 330                     | 208 (158-269)    | 275                       | 203 (156-275)     | 0.880   |
| Serum creatinine (mg/dl)                    | 0.60-1.00       | 328                     | 0.92 (0.75-1.11) | 271                       | 1.12 (0.89-1.67)  | <0.001  |
| eGFR (CKD-EPI) mL/min                       | >80             | 328                     | 83 (64-96)       | 271                       | 61 (37-82)        | <0.001  |
| Serum sodium (mEq/L)                        | 136-145         | 327                     | 138 (135-140)    | 271                       | 138 (136-141)     | 0.034   |
| Serum potassium (mEq/L)                     | 3.4-4.5         | 328                     | 4.0 (3.7-4.4)    | 269                       | 4.0 (3.6-4.4)     | 0.555   |
| Serum chloride (mEq/L)                      | 98-107          | 213                     | 101 (98-103)     | 214                       | 100 (97-104)      | 0.287   |
| CRP (mg/dL)                                 | <5.0            | 324                     | 46 (13-118)      | 270                       | 70 (18-160)       | 0.007   |
| Procalcitonin (ng/mL)                       | <0.5            | 135                     | 46 (13-118)      | 270                       | 70 (18-160)       | 0.007   |
| Ferritin (μg/L)                             | 30-400          | 137                     | 626 (318-1392)   | 130                       | 788 (401-1557)    | 0.080   |
| D-dimer (ng/mL)                             | <232            | 232                     | 789 (426-1699)   | 169                       | 1038 (496-3299)   | 0.020   |
| Interleukin-6 (pg/mL)                       | <7.0            | 50                      | 39 (14-111)      | 35                        | 44 (14-103)       | 0.662   |
| NT-proBNP (pg/mL)                           | <93             | 64                      | 204 (85-554)     | 100                       | 882 (196-3170)    | <0.001  |
| Bilirubin (mg/dL)                           | <1.2            | 289                     | 0.6 (0.4-0.8)    | 251                       | 0.6 (0.4-0.8)     | 0.489   |
| Aspartate transaminase (U/L)                | 18-39           | 325                     | 38 (25-57)       | 271                       | 47 (29-74)        | 0.001   |
| Alanine transaminase (U/L)                  | 10-50           | 323                     | 33 (21-56)       | 272                       | 31 (20 -52)       | 0.483   |
| Lactate dehydrogenase (U/L)                 | 135-225         | 274                     | 362 (239-568)    | 219                       | 368 (260-514)     | 0.959   |
| Creatine phosphokinase (U/L)                | 39-308          | 151                     | 106 (49-306)     | 162                       | 114 (62-343)      | 0.457   |
| Serum albumin (g/L)                         | 45-52           | 164                     | 33 (28-36)       | 163                       | 31 (28-36)        | 0.075   |
| INR                                         | 0.9-1.2         | 302                     | 1.1 (1.0-1.2)    | 251                       | 1.1 (1.0-1.3)     | 0.008   |
| ABG test pH                                 | 7.37-7.45       | 302                     | 7.47 (7.43-7.50) | 240                       | 7.46 (7.42-7.50)  | 0.677   |
| ABG test lactate (mmol/L)                   | 0.5-2.2         | 249                     | 1.1 (0.8-1.5)    | 203                       | 1.3 (1.0-1.8)     | <0.001  |

Data shown as median (IQR) or count (%).

**Legend:** ABG: arterial blood gas, CKD-EPI: chronic kidney disease epidemiology collaboration formula, CRP: C-reactive protein, eGFR: estimated glomerular filtration rate, INR International Normalized Ratio, NT-proBNP: N-terminal fragment of the prohormone brain natriuretic peptide.

**eTable 2. Multivariable logistic regression model for elevated level of troponin (N=533).**

|                                    |             | <i>Multivariable</i> |                  |
|------------------------------------|-------------|----------------------|------------------|
|                                    | Level/Units | OR (95% CI)          | <i>p-value</i>   |
| <b>Sodium</b>                      | +1 mEq/L    | 1.06 (1.02-1.10)     | <i>0.004</i>     |
| <b>CRP</b>                         | +10 mg/L    | 1.03 (1.01-1.05)     | <i>0.002</i>     |
| <b>eGFR (CKD-EPI)</b>              | +10 mL/min  | 0.82 (0.76-0.88)     | <i>&lt;0.001</i> |
| <b>Heart failure</b>               | Yes vs No   | 2.01 (1.07-3.79)     | <i>0.030</i>     |
| <b>Coronary artery disease</b>     | Yes vs No   | 2.04 (1.27-3.29)     | <i>0.003</i>     |
| <b>Prior anticoagulant therapy</b> | Yes vs No   | 2.01 (1.16-3.50)     | <i>0.013</i>     |

**Legend:** CKD-EPI: chronic kidney disease epidemiology collaboration formula; CRP: C reactive protein; eGFR: estimated glomerular filtration rate.

**eTable 3. In-hospital management and outcomes of the study population stratified by baseline troponin level (N=614).**

|                                           | <i>Normal troponin (N=336)</i> |                 | <i>Elevated troponin (N=278)</i> |                 |                  |
|-------------------------------------------|--------------------------------|-----------------|----------------------------------|-----------------|------------------|
|                                           | N                              |                 | N                                |                 | <i>p-value</i>   |
| <b>Hospital length of stay (days)</b>     | 336                            | 14.0 (9.0-25.0) | 278                              | 13.0 (8.0-21.0) | <i>0.030</i>     |
| <b><i>Pharmacological treatment</i></b>   |                                |                 |                                  |                 |                  |
| Lopivavir/Ritonavir                       | 335                            | 91 (27.2)       | 274                              | 88 (32.1)       | <i>0.213</i>     |
| Darunavir/Ritonavir                       | 335                            | 93 (27.8)       | 274                              | 74 (27.0)       | <i>0.908</i>     |
| Remdesivir                                | 335                            | 3 (0.9)         | 274                              | 2 (0.7)         | <i>1.000</i>     |
| Corticosteroid                            | 335                            | 152 (45.4)      | 274                              | 119 (43.4)      | <i>0.691</i>     |
| Tocilizumab                               | 335                            | 24 (7.2)        | 274                              | 22 (8.0)        | <i>0.804</i>     |
| Hydroxychloroquine                        | 335                            | 293 (87.5)      | 274                              | 215 (78.5)      | <i>0.004</i>     |
| Antibiotics                               | 335                            | 286 (85.4)      | 274                              | 245 (89.4)      | <i>0.173</i>     |
| <b><i>Ventilatory support</i></b>         |                                |                 |                                  |                 |                  |
| Oxygen support with FiO <sub>2</sub> <50% | 333                            | 147 (44.1)      | 273                              | 132 (48.4)      | <i>0.341</i>     |
| Oxygen support with FiO <sub>2</sub> ≥50% | 330                            | 153 (46.4)      | 267                              | 163 (61.0)      | <i>&lt;0.001</i> |
| Non-invasive ventilation                  | 334                            | 134 (40.1)      | 274                              | 112 (40.9)      | <i>0.916</i>     |
| Intubation                                | 334                            | 56 (16.8)       | 276                              | 36 (13.0)       | <i>0.244</i>     |
| <b><i>Complication</i></b>                |                                |                 |                                  |                 |                  |
| ARDS                                      | 299                            | 82 (27.4)       | 242                              | 71 (29.3)       | <i>0.692</i>     |
| Sepsis                                    | 328                            | 21 (6.4)        | 265                              | 31 (11.7)       | <i>0.034</i>     |
| Acute renal insufficiency                 | 209                            | 13 (6.2)        | 197                              | 41 (20.8)       | <i>&lt;0.001</i> |
| Multiorgan failure                        | 205                            | 6 (2.9)         | 192                              | 21 (10.9)       | <i>0.003</i>     |
| STEMI                                     | 330                            | 3 (0.9)         | 271                              | 8 (3.0)         | <i>0.073</i>     |
| NSTEMI                                    | 243                            | 1 (0.4)         | 229                              | 16 (7.0)        | <i>&lt;0.001</i> |
| Heart Failure                             | 243                            | 7 (2.9)         | 229                              | 44 (19.2)       | <i>&lt;0.001</i> |
| Ventricular arrhythmia                    | 330                            | 2 (0.6)         | 271                              | 5 (1.8)         | <i>0.253</i>     |
| Pulmonary embolism                        | 330                            | 17 (5.2)        | 272                              | 27 (9.9)        | <i>0.037</i>     |
| Other embolism                            | 330                            | 5 (1.5)         | 272                              | 11 (4.0)        | <i>0.096</i>     |
| Stroke                                    | 330                            | 2 (0.6)         | 272                              | 1 (0.4)         | <i>1.000</i>     |
| Major bleeding                            | 244                            | 4 (1.6)         | 229                              | 16 (7.0)        | <i>0.008</i>     |
| Delirium                                  | 204                            | 3 (1.5)         | 192                              | 13 (6.8)        | <i>0.015</i>     |
| <b><i>Outcome</i></b>                     |                                |                 |                                  |                 |                  |
| Death                                     | 336                            | 44 (13.1)       | 278                              | 104 (37.4)      | <i>&lt;0.001</i> |
| <b><i>Cause of death</i></b>              |                                |                 |                                  |                 |                  |
| Respiratory insufficiency                 | 42                             | 36 (85.7)       | 103                              | 81 (78.6)       | <i>0.455</i>     |
| Myocardial infarction                     | 42                             | 0 (0.0)         | 103                              | 5 (4.9)         | <i>0.322</i>     |
| Pulmonary embolism                        | 42                             | 2 (4.8)         | 103                              | 9 (8.7)         | <i>0.511</i>     |
| Stroke                                    | 42                             | 1 (2.4)         | 103                              | 3 (2.9)         | <i>1.000</i>     |
| Multiorgan failure                        | 42                             | 7 (16.7)        | 103                              | 36 (35.0)       | <i>0.047</i>     |
| Bleeding                                  | 42                             | 1 (2.4)         | 103                              | 3 (2.9)         | <i>1.000</i>     |

Data shown as median (IQR), count (%)

**Legend:** ARDS: acute respiratory distress syndrome; FiO<sub>2</sub>: fraction of inspired oxygen, NSTEMI: non-ST segment elevation myocardial infarction, STEMI: ST segment elevation myocardial infarction.

**eTable 4. Univariable and multivariable Cox regression model for death.**

|                                              | Level/Units               | Univariable       |         | Multivariable<br>N=510* |         |
|----------------------------------------------|---------------------------|-------------------|---------|-------------------------|---------|
|                                              |                           | HR (95% CI)       | p-value | HR (95% CI)             | p-value |
| <b>Age</b>                                   | +5 years                  | 1.33 (1.24-1.44)  | <0.001  | 1.29 (1.16-1.44)        | <0.001  |
| <b>Sex</b>                                   | M vs F                    | 1.44 (0.97-2.14)  | 0.073   | 1.58 (0.99-2.51)        | 0.054   |
| <b>Respiratory rate</b>                      | ≥22 vs <22                | 1.69 (1.12-2.55)  | 0.012   |                         |         |
| <b>Body mass index</b>                       | +1 kg/m <sup>2</sup>      | 1.01 (0.97-1.04)  | 0.687   |                         |         |
| <b>SBP</b>                                   | +10 mmHg                  | 0.95 (0.88-1.03)  | 0.186   |                         |         |
| <b>Oxygen saturation</b>                     | +5 %                      | 0.83 (0.77-0.90)  | <0.001  | 0.87 (0.78-0.97)        | 0.013   |
| <b>RBC</b>                                   | +0.5 x10 <sup>6</sup> /μL | 0.84 (0.75-0.95)  | 0.004   |                         |         |
| <b>WBC</b>                                   | +1000 U/μL                | 1.03 (1.00-1.06)  | 0.053   |                         |         |
| <b>Lymphocytes</b>                           | +100 U/μL                 | 0.93 (0.89-0.96)  | <0.001  |                         |         |
| <b>CRP</b>                                   | +10 mg/L                  | 1.03 (1.01-1.04)  | <0.001  | 1.03 (1.01-1.05)        | 0.006   |
| <b>Troponin</b>                              | Elevated vs Normal        | 3.22 (2.26-4.59)  | <0.001  | 1.71 (1.13-2.59)        | 0.012   |
| <b>NT-proBNP</b>                             | +1000 ng/L                | 1.03 (1.00-1.05)  | 0.026   |                         |         |
| <b>LDH</b>                                   | +1000 mg/dL               | 1.11 (1.04-1.18)  | 0.001   |                         |         |
| <b>Bilirubin</b>                             | +0.3 mg/dL                | 1.07 (0.96-1.19)  | 0.249   |                         |         |
| <b>D-dimer</b>                               | +1000 ng/mL               | 1.02 (0.99-1.05)  | 0.271   |                         |         |
| <b>Creatinine</b>                            | +1 mg/dL                  | 1.12 (1.05-1.20)  | <0.001  |                         |         |
| <b>eGFR (CKD-EPI)</b>                        | +10 mg/L                  | 0.83 (0.78-0.87)  | <0.001  | 0.95 (0.86-1.04)        | 0.263   |
| <b>INR</b>                                   | +1                        | 1.18 (0.98-1.41)  | 0.075   |                         |         |
| <b>ABG test lactate</b>                      | +1 mmol/L                 | 1.20 (1.12-1.29)  | <0.001  |                         |         |
| <b>PaO<sub>2</sub>/FiO<sub>2</sub></b>       | +50 mmHg/%                | 0.89 (0.82-0.96)  | 0.003   | 0.89 (0.80-0.99)        | 0.030   |
| <b>Interleukin-6</b>                         | +10 pg/mL                 | 1.00 (1.00-1.01)  | 0.216   |                         |         |
| <b>SOFA</b>                                  | +1 point                  | 1.36 (1.26-1.47)  | <0.001  |                         |         |
| <b>SOFA</b>                                  | 3-4-5 vs 0-1-2            | 3.37 (2.00-5.68)  | <0.001  |                         |         |
| <b>SOFA</b>                                  | ≥6 vs 0-1-2               | 6.75 (3.65-12.48) | <0.001  |                         |         |
| <b>Heart failure</b>                         | Yes vs No                 | 2.54 (1.75-3.68)  | <0.001  | 2.15 (1.28-3.63)        | 0.004   |
| <b>Coronary artery disease</b>               | Yes vs No                 | 2.16 (1.54-3.04)  | <0.001  | 1.12 (0.71-1.76)        | 0.629   |
| <b>Atrial fibrillation</b>                   | Yes vs No                 | 2.34 (1.62-3.38)  | <0.001  | 1.14 (0.69-1.86)        | 0.615   |
| <b>Chronic obstructive pulmonary disease</b> | Yes vs No                 | 1.88 (1.20-2.97)  | 0.006   | 1.34 (0.78-2.32)        | 0.286   |
| <b>Diabetes</b>                              | Yes vs No                 | 1.41 (0.99-2.02)  | 0.057   |                         |         |
| <b>Obesity</b>                               | Yes vs No                 | 1.26 (0.85-1.85)  | 0.25    |                         |         |
| <b>Hypertension</b>                          | Yes vs No                 | 1.95 (1.37-2.78)  | <0.001  | 1.26 (0.81-1.96)        | 0.312   |
| <b>Chronic kidney disease</b>                | Yes vs No                 | 2.68 (1.90-3.79)  | <0.001  | 1.03 (0.60-1.78)        | 0.908   |
| <b>Smoking</b>                               | Ever vs Never smoker      | 1.33 (1.24-1.44)  | <0.001  |                         |         |
| <b>Prior ACEi/ARB therapy</b>                | Yes vs No                 | 1.62 (1.16-2.25)  | 0.005   |                         |         |
| <b>Prior statin therapy</b>                  | Yes vs No                 | 1.73 (1.23-2.43)  | 0.002   |                         |         |

\*number of patients with complete data

**Legend:** ABG: arterial blood gas, ACEi: angiotensin converting enzyme inhibitor, ARB: angiotensin receptor blocker, , CKD-EPI: chronic kidney disease epidemiology collaboration formula, CRP: C-reactive protein, eGFR:

estimated glomerular filtration rate,  $\text{FiO}_2$ : fraction of inspired oxygen, INR International Normalized Ratio, NT-proBNP: N-terminal fragment of the prohormone brain natriuretic peptide,  $\text{PaO}_2$ : oxygen partial pressure at arterial gas analysis, RBC red blood cell, SBP Systolic blood pressure; SOFA: sequential organ failure assessment, WBC white blood cell.

**eTable 5. Univariable and multivariable Cox regression model for death, including lymphocytes and respiratory rate.**

|                                              | Level/Units        | <i>Univariable</i> |                | <i>Multivariable</i><br><i>N=334*</i> |                |
|----------------------------------------------|--------------------|--------------------|----------------|---------------------------------------|----------------|
|                                              |                    | HR (95% CI)        | <i>p-value</i> | HR (95% CI)                           | <i>p-value</i> |
| <b>Age</b>                                   | +5 years           | 1.33 (1.24-1.44)   | <0.001         | 1.32 (1.16-1.51)                      | <0.001         |
| <b>Sex</b>                                   | M vs F             | 1.44 (0.97-2.14)   | 0.073          | 1.98 (1.11-3.52)                      | 0.020          |
| <b>Respiratory rate</b>                      | ≥22 vs <22         | 1.69 (1.12-2.55)   | 0.012          | 1.35 (0.82-2.24)                      | 0.242          |
| <b>Oxygen saturation</b>                     | +5 %               | 0.83 (0.77-0.90)   | <0.001         | 0.79 (0.70-0.90)                      | <0.001         |
| <b>Lymphocytes</b>                           | +100 U/μL          | 0.93 (0.89-0.96)   | <0.001         | 0.99 (0.94-1.04)                      | 0.610          |
| <b>CRP</b>                                   | +10 mg/L           | 1.03 (1.01-1.04)   | <0.001         | 1.03 (1.00-1.05)                      | 0.021          |
| <b>Troponin</b>                              | Elevated vs Normal | 3.22 (2.26-4.59)   | <0.001         | 1.65 (1.03-2.62)                      | 0.036          |
| <b>eGFR (CKD-EPI)</b>                        | +10 mL/min         | 0.83 (0.78-0.87)   | <0.001         | 0.87 (0.78-0.98)                      | 0.021          |
| <b>PaO<sub>2</sub>/FiO<sub>2</sub></b>       | +50 mmHg/%         | 0.89 (0.82-0.96)   | 0.003          | 0.94 (0.83-1.07)                      | 0.350          |
| <b>Comorbidities</b>                         |                    |                    |                |                                       |                |
| <b>Heart failure</b>                         | Yes vs No          | 2.54 (1.75-3.68)   | <0.001         | 1.46 (0.75-2.81)                      | 0.263          |
| <b>Coronary artery disease</b>               | Yes vs No          | 2.16 (1.54-3.04)   | <0.001         | 1.13 (0.67-1.90)                      | 0.649          |
| <b>Atrial fibrillation</b>                   | Yes vs No          | 2.34 (1.62-3.38)   | <0.001         | 1.12 (0.62-2.04)                      | 0.706          |
| <b>Chronic obstructive pulmonary disease</b> | Yes vs No          | 1.88 (1.20-2.97)   | 0.006          | 1.81 (1.00-3.26)                      | 0.051          |
| <b>Hypertension</b>                          | Yes vs No          | 1.95 (1.37-2.78)   | <0.001         | 1.18 (0.70-2.00)                      | 0.542          |
| <b>Chronic kidney disease</b>                | Yes vs No          | 2.68 (1.90-3.79)   | <0.001         | 0.90 (0.48-1.69)                      | 0.749          |

\*number of patients with complete data

**Legend:** CKD-EPI: chronic kidney disease epidemiology collaboration formula, CRP: C-reactive protein, eGFR: estimated glomerular filtration rate, FiO<sub>2</sub>: fraction of inspired oxygen, PaO<sub>2</sub>: oxygen partial pressure at arterial gas analysis.

**eTable 6. Univariable and multivariable Cox regression model for death, including lymphocytes, respiratory rate, prior ACEi/ARB therapy and prior statin therapy.**

|                                              | Level/Units        | <i>Univariable</i> |                | <i>Multivariable</i><br><i>N=299*</i> |                |
|----------------------------------------------|--------------------|--------------------|----------------|---------------------------------------|----------------|
|                                              |                    | HR (95% CI)        | <i>p-value</i> | HR (95% CI)                           | <i>p-value</i> |
| <b>Age</b>                                   | +5 years           | 1.33 (1.24-1.44)   | <0.001         | 1.31 (1.14-1.51)                      | <0.001         |
| <b>Sex</b>                                   | M vs F             | 1.44 (0.97-2.14)   | 0.073          | 2.19 (1.17-4.11)                      | 0.015          |
| <b>Respiratory rate</b>                      | ≥22 vs <22         | 1.69 (1.12-2.55)   | 0.012          | 1.30 (0.76-2.21)                      | 0.335          |
| <b>Oxygen saturation</b>                     | +5 %               | 0.83 (0.77-0.90)   | <0.001         | 0.80 (0.70-0.91)                      | 0.001          |
| <b>Lymphocytes</b>                           | +100               | 0.93 (0.89-0.96)   | <0.001         | 0.99 (0.94-1.05)                      | 0.84           |
| <b>CRP</b>                                   | +10 mg/L           | 1.03 (1.01-1.04)   | <0.001         | 1.03 (1.01-1.05)                      | 0.015          |
| <b>Troponin</b>                              | Elevated vs Normal | 3.22 (2.26-4.59)   | <0.001         | 1.50 (0.92-2.45)                      | 0.108          |
| <b>eGFR (CKD-EPI)</b>                        | +10 mL/min         | 0.83 (0.78-0.87)   | <0.001         | 0.85 (0.76-0.96)                      | 0.009          |
| <b>PaO<sub>2</sub>/FiO<sub>2</sub></b>       | +50 mmHg/%         | 0.89 (0.82-0.96)   | 0.003          | 0.95 (0.83-1.09)                      | 0.45           |
| <b>Comorbidities</b>                         |                    |                    |                |                                       |                |
| <b>Heart failure</b>                         | Yes vs No          | 2.54 (1.75-3.68)   | <0.001         | 1.20 (0.60-2.40)                      | 0.615          |
| <b>Ischemic cardiomyopathy</b>               | Yes vs No          | 2.16 (1.54-3.04)   | <0.001         | 1.06 (0.57-2.00)                      | 0.848          |
| <b>Atrial fibrillation</b>                   | Yes vs No          | 2.34 (1.62-3.38)   | <0.001         | 1.18 (0.63-2.20)                      | 0.608          |
| <b>Chronic obstructive pulmonary disease</b> | Yes vs No          | 1.88 (1.20-2.97)   | 0.006          | 1.91 (1.02-3.59)                      | 0.043          |
| <b>Hypertension</b>                          | Yes vs No          | 1.95 (1.37-2.78)   | <0.001         | 1.03 (0.57-1.86)                      | 0.934          |
| <b>Chronic kidney disease</b>                | Yes vs No          | 2.68 (1.90-3.79)   | <0.001         | 0.83 (0.43-1.63)                      | 0.595          |
| <b>Prior ACEi/ARB therapy</b>                | Yes vs No          | 1.62 (1.16-2.25)   | 0.005          | 1.21 (0.69-2.11)                      | 0.501          |
| <b>Prior statin therapy</b>                  | Yes vs No          | 1.73 (1.23-2.43)   | 0.002          | 1.23 (0.69-2.21)                      | 0.484          |

\*number of patients with complete data

**Legend:** ACEi: angiotensin converting enzyme inhibitor, ARB: angiotensin receptor blocker, CKD-EPI: chronic kidney disease epidemiology collaboration formula, CRP: C-reactive protein, eGFR: estimated glomerular filtration rate, FiO<sub>2</sub>: fraction of inspired oxygen, PaO<sub>2</sub>: oxygen partial pressure at arterial gas analysis.

**eTable 7. Univariable and multivariable Cox regression model, including prior ACEi/ARB therapy and prior statin therapy.**

| <b>Variable</b>                              |                    | <b>Univariable</b> |             | <b>Multivariable<br/>N=473*</b> |             |
|----------------------------------------------|--------------------|--------------------|-------------|---------------------------------|-------------|
|                                              |                    | Level/Units        | HR (95% CI) | <i>p</i> -value                 | HR (95% CI) |
| <b>Age</b>                                   | +5 years           | 1.33 (1.24-1.44)   | <0.001      | 1.30 (1.16-1.45)                | <0.001      |
| <b>Sex</b>                                   | M vs F             | 1.44 (0.97-2.14)   | 0.073       | 1.59 (0.97-2.58)                | 0.064       |
| <b>Oxygen saturation</b>                     | +5 %               | 0.83 (0.77-0.90)   | <0.001      | 0.87 (0.78-0.97)                | 0.012       |
| <b>CRP</b>                                   | +10 mg/L           | 1.03 (1.01-1.04)   | <0.001      | 1.03 (1.01-1.05)                | 0.006       |
| <b>Troponin</b>                              | Elevated vs Normal | 3.22 (2.26-4.59)   | <0.001      | 1.61 (1.05-2.47)                | 0.028       |
| <b>eGFR (CKD-EPI)</b>                        | +10 mL/min         | 0.83 (0.78-0.87)   | <0.001      | 0.94 (0.85-1.04)                | 0.228       |
| <b>PaO<sub>2</sub>/FiO<sub>2</sub></b>       | +50 mmHg/%         | 0.89 (0.82-0.96)   | 0.003       | 0.89 (0.80-1.00)                | 0.053       |
| <b>Comorbidities</b>                         |                    |                    |             |                                 |             |
| <b>Heart failure</b>                         | Yes vs No          | 2.54 (1.75-3.68)   | <0.001      | 1.86 (1.07-3.21)                | 0.027       |
| <b>Coronary artery disease</b>               | Yes vs No          | 2.16 (1.54-3.04)   | <0.001      | 1.31 (0.78-2.18)                | 0.308       |
| <b>Atrial fibrillation</b>                   | Yes vs No          | 2.34 (1.62-3.38)   | <0.001      | 1.21 (0.72-2.03)                | 0.472       |
| <b>Chronic obstructive pulmonary disease</b> | Yes vs No          | 1.88 (1.20-2.97)   | 0.006       | 1.34 (0.76-2.38)                | 0.314       |
| <b>Hypertension</b>                          | Yes vs No          | 1.95 (1.37-2.78)   | <0.001      | 1.16 (0.71-1.90)                | 0.547       |
| <b>Chronic kidney disease</b>                | Yes vs No          | 2.68 (1.90-3.79)   | <0.001      | 1.05 (0.59-1.87)                | 0.857       |
| <b>Prior ACEi/ARB therapy</b>                | Yes vs No          | 1.62 (1.16-2.25)   | 0.005       | 1.10 (0.72-1.69)                | 0.646       |
| <b>Prior statin therapy</b>                  | Yes vs No          | 1.73 (1.23-2.43)   | 0.002       | 0.85 (0.53-1.37)                | 0.506       |

\*number of patients with complete data

**Legend:** ACEi: angiotensin converting enzyme inhibitor, ARB: angiotensin receptor blocker, CKD-EPI: chronic kidney disease epidemiology collaboration formula, CRP: C-reactive protein, eGFR: estimated glomerular filtration rate, FiO<sub>2</sub>: fraction of inspired oxygen, PaO<sub>2</sub>: oxygen partial pressure at arterial gas analysis.
